1           **Task-specific roles of local interneurons for inter -and intraglomerular**  
2                                   **signaling in the insect antennal lobe**

3

4

5           **Abbreviated Title:** Odor evoked Ca<sup>2+</sup> signals in glomeruli of local interneurons

6

7                                   Debora Fusca and Peter Kloppenburg

8

9

10          Biocenter, Institute for Zoology, and Cologne Excellence Cluster on Cellular Stress

11                Responses in Aging-Associated Diseases (CECAD), University of Cologne,

12                                Zùlpicher Str 47b, 50674 Cologne, Germany

13

14

15    Contact:

16    Peter Kloppenburg

17    University of Cologne

18    Biocenter

19    Zùlpicher Str. 47b

20    50674 Cologne, Germany

21    [peter.kloppenburg@uni-koeln.de](mailto:peter.kloppenburg@uni-koeln.de)

22

23

24

25    **Keywords**

26    antennal lobe, calcium imaging, local interneurons, olfaction

27

28 **Abstract**

29 Local interneurons (LNs) mediate complex interactions within the antennal lobe, the  
30 primary olfactory system of insects, and the functional analog of the vertebrate  
31 olfactory bulb. In the cockroach *Periplaneta Americana*, as in other insects, several  
32 types of LNs with distinctive physiological and morphological properties can be  
33 defined. Here, we combined whole-cell patch clamp recordings and  $Ca^{2+}$  imaging of  
34 individual LNs to analyze the role of spiking and nonspiking LNs in inter- and  
35 intraglomerular signaling during olfactory information processing. Spiking GABAergic  
36 LNs reacted to odorant stimulation with a uniform rise in  $[Ca^{2+}]_i$  in the ramifications of  
37 all innervated glomeruli. In contrast, in nonspiking LNs, glomerular  $Ca^{2+}$  signals were  
38 odorant specific and varied between glomeruli, resulting in distinct, glomerulus-specific  
39 tuning curves. The cell type-specific differences in  $Ca^{2+}$  dynamics support the idea that  
40 spiking LNs play a primary role in interglomerular signaling, while they assign  
41 nonspiking LNs an essential role in intraglomerular signaling.

42

## 43 INTRODUCTION

44 Local interneurons (LNs) with markedly different functional phenotypes are crucial for  
45 odor information processing in the insect antennal lobe (AL). The AL is the first synaptic  
46 relay in the insect olfactory system, showing striking structural and functional  
47 similarities to the vertebrates' olfactory bulb. In many regards, the LNs in the AL are  
48 the functional equivalent of granule cells, but also periglomerular and short axon cells  
49 in the vertebrate olfactory bulb (Ennis et al., 2015; Shepherd et al., 2004). They help  
50 to structure the odor representation in the AL, ultimately shaping the tuning profiles of  
51 the olfactory projection (output) neurons.

52       Based on initial studies, LNs originally have been characterized as GABAergic  
53 and multiglomerular (Distler, 1989; Hoskins et al., 1986; Waldrop et al., 1987).  
54 Typically, they can generate Na<sup>+</sup>-driven action potentials (Chou et al., 2010;  
55 Christensen et al., 1993; Husch et al., 2009a; Seki et al., 2010) or Ca<sup>2+</sup>-driven spikelets  
56 (Laurent and Davidowitz, 1994). Accordingly, these neurons have been associated  
57 with inhibitory interglomerular signaling, i.e., with mediating lateral inhibition to  
58 enhance contrast and to control timing and synchronization of neuronal activity (Assisi  
59 and Bazhenov, 2012; Christensen et al., 1998; Fujiwara et al., 2014; MacLeod and  
60 Laurent, 1996; Nagel and Wilson, 2016; Sachse and Galizia, 2002). Subsequent  
61 studies showed that LNs can also synthesize other potential neurotransmitters and  
62 neuromodulators (Berg et al., 2007; Chou et al., 2010; Das et al., 2011; Distler, 1990;  
63 Fusca et al., 2013, 2015; Neupert et al., 2012; Shang et al., 2007). In fact, they can be  
64 excitatory, distributing excitatory synaptic input to (projection) neurons in other  
65 glomeruli (Assisi et al., 2012; Huang et al., 2010; Yaksi and Wilson, 2010).

66 Furthermore, nonspiking LNs with weak active membrane properties that do not  
67 generate Na<sup>+</sup> driven action potentials have been described in both holo- and  
68 hemimetabolous insect species (Husch et al., 2009a, 2009b; Tabuchi et al., 2015).  
69 While their functional role for odor information processing is not clear yet, it is plausible  
70 to assume that they are functionally highly relevant since they have been found across  
71 different insect species. In *P. americana*, the nonspiking LNs are named type II LNs  
72 (Fusca et al., 2013; Husch et al., 2009a, 2009b). They exist in two main types (type IIa  
73 and type IIb LNs) with different active membrane properties. Type IIa LNs have strong  
74 Ca<sup>2+</sup> mediated active properties and respond to odorant stimulation with patterns of  
75 excitation and inhibition. A subset of type IIa LNs is cholinergic and can generate Ca<sup>2+</sup>  
76 driven spikelets (type IIa1). Type IIb LNs respond with slow, sustained depolarizations.

77 Based on their functional and morphological properties, it can be hypothesized  
78 that they are mostly involved in intraglomerular signaling since the graded changes in  
79 membrane potentials can only spread within the same or electrotonically close  
80 glomeruli, as was proposed for nonspiking LNs in the rabbit olfactory bulb (Bufler et  
81 al., 1992a).

82 This study's rationale was based on the previously reported structural and  
83 functional differences between distinct LN types in the cockroach AL (Fusca et al.,  
84 2013, 2015; Husch et al., 2009a, 2009b; Pippow et al., 2009). Spiking type I LNs are  
85 GABAergic, inhibitory, and innervate many but not all glomeruli. While some glomeruli  
86 are densely innervated, others are more sparsely or not at all innervated (Figure 1A).  
87 It has been considered that this reflects an organization with distinctive input and  
88 output glomeruli (Galizia and Kimmerle, 2004; Husch et al., 2009a; Wilson and  
89 Laurent, 2005). In this model, synaptic input is integrated and triggers action potential

90 firing. The action potentials propagate to the innervated glomeruli and provide a  
91 defined glomeruli array with inhibitory synaptic input. Glomeruli can interact  
92 independently of their spatial and electrotonic distance. In this scenario, one would  
93 expect that odor-evoked glomerular  $\text{Ca}^{2+}$  signals are dominated by  $\text{Ca}^{2+}$  influx through  
94 voltage-gated channels that are activated by the action potentials. Thus, odor induced  
95  $\text{Ca}^{2+}$  signals should be detectable and comparable in all innervated glomeruli.

96 In contrast, nonspiking type II LNs have very similar branching patterns in all  
97 glomeruli (Figure 1B, Husch et al., 2009b), suggesting that both input and output can  
98 occur in every glomerulus. Due to the receptor and sensillum type-specific input  
99 configuration of the glomeruli in the AL (Fujimura et al., 1991; Watanabe et al., 2012),  
100 synaptic input during olfactory stimulation typically occurs only in a limited number of  
101 glomeruli (Sachse et al., 1999; Silbering et al., 2011). The resulting stimulus-evoked  
102 graded postsynaptic potentials can only spread within the same glomerulus or  
103 electrotonically nearby glomeruli. Since these neurons cannot generate  $\text{Na}^{+}$ -driven  
104 action potentials, we hypothesize that the  $\text{Ca}^{2+}$  signals are dominated by odorant  
105 evoked  $\text{Ca}^{2+}$  influx through excitatory ligand-gated channels (Oliveira et al., 2010).

106 This study investigated the role of spiking and nonspiking LNs for inter- and  
107 intraglomerular signaling during olfactory information processing. To this end, we  
108 combined whole-cell patch clamp recordings with  $\text{Ca}^{2+}$  imaging to analyze the local  
109  $\text{Ca}^{2+}$  dynamics of neurites in individual glomeruli as an indicator of signal processing  
110 in single LNs. The recordings were performed in the AL of the cockroach *Periplaneta*  
111 *americana*. This is an experimental system in which the olfactory system's circuitry has  
112 been analyzed in great detail on the physiological (Bradler C, 2016; Ernst and Boeckh,  
113 1983; Husch et al., 2009a, 2009b; Lemon and Getz, 1997, 1998, 2000; Nishino et al.,

114 2012, 2018; Paeger et al., 2017; Paoli et al., 2020; Pippow et al., 2009; Strausfeld and  
115 Li, 1999; Warren and Kloppenburg, 2014; Watanabe et al., 2017), biochemical (Distler,  
116 1989, 1990; Fusca et al., 2013, 2015; Neupert et al., 2012, 2018), and structural/  
117 ultrastructural levels (Distler and Boeckh, 1997a, 1997b; Distler et al., 1998; Malun,  
118 1991a, 1991b; Malun et al., 1993; Nishino et al., 2015; Watanabe et al., 2010), thus  
119 contributing very successfully to understanding olfactory information processing  
120 principles.

121

## 122 **RESULTS**

123 Local interneurons of the insect AL are a heterogeneous group of neurons, consisting  
124 of different neuronal subpopulations with clearly defined, sometimes fundamentally  
125 different functional phenotypes. To study the role of spiking type I LNs and nonspiking  
126 type II LNs for inter and intraglomerular signaling, we combined whole-cell patch clamp  
127 recordings,  $Ca^{2+}$  imaging, and single cell labeling. This way, the cells were  
128 unequivocally identified by their physiological and morphological characteristics. In the  
129 investigated LNs, we measured the intracellular  $Ca^{2+}$  dynamics of neurites during  
130 olfactory stimulation simultaneously in many individual glomeruli. To determine  
131 differences in the odor-induced  $Ca^{2+}$  signals between individual glomeruli, tuning  
132 curves were constructed from the odor-evoked glomerular  $Ca^{2+}$  signals by normalizing  
133 them to the maximum signal amplitude of each glomerulus. Overall, this study is based  
134 on 17 recordings of type I LNs and 18 recordings of type II LNs. In each recorded LN,  
135 between 10 and 25 distinct glomeruli could be identified and individually imaged and  
136 analyzed.

137 In the first set of experiments, we showed that the odor-induced  $Ca^{2+}$ -dynamics

138 were highly reproducible when the antennae were repeatedly stimulated with the same  
139 odorant (Figure 2). This is in line with previous electrophysiological studies, in which  
140 LNs responded very reproducibly to repeated olfactory stimulations (Husch et al.,  
141 2009a, 2009b; Olsen and Wilson, 2008). Hence, in subsequent experiments, we  
142 analyzed single-sweep optophysiological recordings rather than averaged data.

143

#### 144 *Uniform glomerular odor responses in spiking type I LNs*

145 All recorded type I LNs displayed characteristic morphological features, i.e.,  
146 arborizations in multiple glomeruli with varying neurite densities between glomeruli  
147 (Figure 3A). Electrophysiologically, type I LNs reacted to odor stimulation of the  
148 antennae with odorant specific patterns of overshooting action potentials (Figure 3B).  
149 The glomerular  $\text{Ca}^{2+}$  signals were time-locked with the electrophysiological responses.  
150 While the absolute amplitudes of the  $\text{Ca}^{2+}$  signals during a given odorant varied  
151 between individual glomeruli, the time course and overall structure of the  $\text{Ca}^{2+}$  signals  
152 were very similar in all recorded glomeruli for a particular odorant (Figure 3B, Figure 3-  
153 figure supplement 1), resulting in identical tuning curves for all glomeruli of a given  
154 neuron (Figure 3C). Accordingly, tuning curves of all imaged glomeruli of a given  
155 neuron always correlated with coefficients of  $\sim 1$ , with a mean correlation coefficient  
156 across all investigated spiking LNs of  $r=0.96 \pm 0.03$  (N=17, Figure 3D-F).

157

#### 158 *Suppression of action potential firing in type I LNs decreases correlations of glomerular* 159 *$\text{Ca}^{2+}$ signals*

160 We hypothesized that the observed  $\text{Ca}^{2+}$  signals in type I LNs mainly reflect the  
161 voltage-dependent  $\text{Ca}^{2+}$  influx induced by propagated action potentials. To test this

162 hypothesis, we used two approaches to prevent the neurons from spiking. The neurons  
163 were hyperpolarized to membrane potentials between -80 mV to -100 mV (Figure 4A,  
164 top trace) or firing was suppressed by intracellularly blocking Na<sup>+</sup> channels with QX-  
165 314. When the generation of action potentials is inhibited, the remaining Ca<sup>2+</sup> signals  
166 should mainly reflect Ca<sup>2+</sup> influx via ligand-gated channels (e.g., cholinergic receptors,  
167 Oliveira et al., 2010).

168       When action potential firing was prevented by hyperpolarization, odor stimulation  
169 still elicited Ca<sup>2+</sup> signals in the glomeruli. Besides a reduction in amplitude, the  
170 uniformity of the Ca<sup>2+</sup> signals between different glomeruli disappeared. In turn, the  
171 tuning curves of the individual glomeruli became different from each other (Figure 4B  
172 and Figure 4–figure supplement 1). This is quantitatively reflected in the glomerulus-  
173 specific odorant responses and the diverse correlations between the glomerular tuning  
174 curves, resulting in a decreased mean correlation coefficient across all hyperpolarized  
175 type I LNs of  $r=0.73 \pm 0.19$  (N=6, Figure 4C-E). Similar results were obtained when AP  
176 firing was suppressed by intracellularly blocking Na<sup>+</sup> channels with QX-314 ( $r=0.71 \pm$   
177  $0.28$ , N=5, Figure 4D,E). Differences in mean correlation coefficients were significant  
178 between control and hyperpolarized type I LNs ( $p=0.002$ ) as well as between control  
179 and type I LNs that were treated with QX-314 ( $p=0.007$ ). Mean correlation coefficients  
180 of hyperpolarized and QX-314 treated type I LNs were not significantly different  
181 ( $p>0.999$ ).

182       Taken together, our results are in line with the conception that type I LNs integrate  
183 and transform their synaptic input to action potential firing to provide inhibitory synaptic  
184 input to neurons in a defined array of glomeruli. Our results also provide physiological  
185 evidence that an individual type I LN receives excitatory input not only in one but in



186 several glomeruli, which is in line with previous structural- and ultrastructural studies  
187 that reported evidence for both pre- and postsynaptic profiles in individual glomeruli  
188 (Berck et al., 2016; Distler and Boeckh, 1997b; Mohamed et al., 2019).

189

#### 190 *Variable glomerular odor responses in nonspiking type II LN*

191 In contrast to the uniform  $\text{Ca}^{2+}$  dynamics during odor stimulation in type I LNs, we  
192 observed highly heterogeneous  $\text{Ca}^{2+}$  dynamics between the individual glomeruli in  
193 most type II LNs (Figure 5A-J). All recorded type II LNs had the cell type-specific  
194 morphology characterized by innervation of all glomeruli with similar neurite densities  
195 in all glomeruli of a given neuron (Figure 5A,E). All type II LNs typically reacted to the  
196 olfactory stimulation with graded changes in membrane potential. (Figure 5B,F, top  
197 traces). The amplitudes of the corresponding  $\text{Ca}^{2+}$  signals were in the range of the  
198 signals of type I LNs after the suppression of their action potentials. While the  
199 electrophysiological responses to different odorants were similar in a given neuron, the  
200 corresponding glomerular  $\text{Ca}^{2+}$  signals were odor specific and varied between  
201 glomeruli, resulting in distinct, glomerulus specific tuning curves (Figure 5C-H and  
202 Figure 5–Figure supplement 1), which was also directly evident in a rather low degree  
203 of correlation (Figure 5I;  $r=0.53 \pm 0.23$ ,  $N=18$ ). However, the correlation between tuning  
204 curves of individual glomeruli in a given neuron differed among type II LNs. While in  
205 most nonspiking LNs, the majority of glomeruli was individually tuned, in 8 out of 18  
206 neurons, groups of similarly tuned glomeruli were found. This is shown in the heatmaps  
207 showing highly correlated  $\text{Ca}^{2+}$  signals in groups of glomeruli as well as glomeruli that  
208 were not correlated (Figure 5G,H,J and Figure 5–figure supplement 2).  
209 Mechanistically, this could be caused by similar input to several glomeruli (Watanabe

210 et al., 2012) or by coordinated activity, e.g., via spikelets that were observed in a sub-  
211 type of nonspiking neurons (type IIa1 LNs, Fusca et al., 2013).

212

## 213 **DISCUSSION**

214 Processing of sensory input by networks of spiking and nonspiking interneurons is a  
215 common principle in both invertebrate and vertebrate sensory systems, e.g.,  
216 structuring the signal pathway from sensory neurons (tactile hairs) to intersegmental  
217 and motor neurons in the insect thoracic ganglion (Burrows, 1989; Pearson and  
218 Fournier, 1975) and the mammalian olfactory bulb (Büfler et al., 1992b, 1992a; Wellis  
219 and Scott, 1990) and retina (Diamond, 2017). Nevertheless, in many systems, the role  
220 of nonspiking neurons is not well understood.

221       Local interneurons are key components of the insect olfactory system. They have  
222 fundamentally different functional phenotypes suggesting different tasks during odor  
223 information processing. To help elucidate mechanisms of odor processing on the level  
224 of individual LNs, this study assessed local  $\text{Ca}^{2+}$  dynamics in distinct functional  
225 compartments (ramifications in individual glomeruli) of spiking type I and nonspiking  
226 type II LNs during olfactory information processing. To this end, individual LNs were  
227 analyzed by combined whole-cell patch clamp recordings and  $\text{Ca}^{2+}$  imaging. Local  
228  $\text{Ca}^{2+}$  dynamics are likely to reflect the role of LNs in odor information processing, i.e.,  
229 for their potential role in intra- and interglomerular signaling, which depends crucially  
230 on signal propagation throughout individual LNs. In line with the electrophysiological  
231 properties, we found odorant evoked  $\text{Ca}^{2+}$  signals that were homogeneous across the  
232 whole cell in spiking type I LNs and odor and glomeruli specific  $\text{Ca}^{2+}$  signals in  
233 nonspiking type II LNs. This is reflected in the highly correlated tuning curves in type I

234 LNs and low correlations between tuning curves in type II LNs. In the following, we  
235 discuss whether and how this is consistent with previous studies suggesting that  
236 spiking type I LNs play a role in lateral, interglomerular signaling and why this study  
237 assigns a role to nonspiking LNs in local, intraglomerular signaling.

238

### 239 *Interglomerular signaling via spiking type I LNs*

240 Processing of olfactory information in the AL involves complex interactions between  
241 the glomerular pathways and between different AL neurons. Previous studies in  
242 different insect species have suggested that GABAergic LNs can mediate lateral  
243 inhibition by providing inhibitory synaptic input to defined odor specific arrays of  
244 glomeruli. This hypothesis is in agreement with the current study, where spiking type I  
245 LNs showed odorant specific glomerular  $Ca^{2+}$  dynamics, which were always uniform  
246 in every imaged glomerulus. As the glomerular signals in these neurons correlated  
247 very well with the electrophysiological activity, it is plausible that synaptic inputs to one  
248 or a few glomeruli are integrated and result in the firing of action potentials, which  
249 propagate to the neurites of all innervated glomeruli where they induce highly  
250 correlated voltage-activated  $Ca^{2+}$  signals. Since type I LNs express GABA-like  
251 immunoreactivity and provide inhibitory input to uPNs and other LNs in all innervated  
252 glomeruli (Distler, 1989; Distler and Boeckh, 1997c; Husch et al., 2009a; Warren and  
253 Kloppenburg, 2014), these neurons are likely part of an inhibitory network that  
254 mediates lateral inhibition and contrast enhancement (Sachse and Galizia, 2002;  
255 Wilson and Laurent, 2005).

256         However, it is important to consider that the experiments with suppressed AP  
257 firing showed not well correlated odor-induced  $Ca^{2+}$  signals, i.e., tuning curves in the

258 individual glomeruli of type I LNs. This is in line with the hypothesis that odor induced  
259  $\text{Ca}^{2+}$  signals under control condition originate mostly from action potential induced  $\text{Ca}^{2+}$   
260 influx via voltage-activated  $\text{Ca}^{2+}$  channels. These data also show that the hypothesized  
261 polar organization of type I LNs with strictly defined (and separated) input and output  
262 glomeruli is not entirely correct. When type I LNs were prevented from spiking by  
263 hyperpolarization or intracellular block of  $\text{Na}^+$  channels, we observed distinct, glomeruli  
264 specific  $\text{Ca}^{2+}$  dynamics during odor stimulation. It is likely that these signals originate  
265 from  $\text{Ca}^{2+}$  influx through  $\text{Ca}^{2+}$  permeable excitatory receptors such as cholinergic  
266 receptors, suggesting that each neuron can potentially receive excitatory olfactory  
267 input in any innervated glomerulus. This notion agrees with previous studies in the fly,  
268 which suggested that individual GABAergic LNs receive broad, but not uniform, spatial  
269 patterns of excitation by either OSNs or PNs (Wilson and Laurent, 2005).

270

### 271 *Inter- and intraglomerular signaling via nonspiking type II LN*

272 The nonspiking LNs that have been described in the AL of insects typically innervate  
273 all glomeruli (Husch et al., 2009a, 2009b; Tabuchi et al., 2015). In most of these  
274 neurons, we observed highly heterogeneous  $\text{Ca}^{2+}$  dynamics between the individual  
275 glomeruli resulting in distinct tuning curves for the individual glomeruli. These  
276 heterogeneous and glomerulus specific  $\text{Ca}^{2+}$  dynamics imply that type II LNs have  
277 distinct functional domains that are (more or less) independent from each other.  
278 Accordingly, the majority of nonspiking type II LNs might contribute to microcircuits  
279 within glomeruli and mediate intraglomerular signaling rather than interconnecting  
280 multiple glomeruli.

281 Intraglomerular circuits are known from the mouse or rat olfactory bulb (for review

282 see Ennis et al., 2015), where periglomerular, external tufted, and short axon cells  
283 interact to modulate the output of Mitral/ Tufted cells (Aungst et al., 2003; Liu et al.,  
284 2016; Najac et al., 2015; Wachowiak and Shipley, 2006). Periglomerular cells are  
285 uniglomerular local interneurons that mediate intraglomerular synaptic signaling.  
286 Unlike periglomerular cells, cockroach type II LNs innervate all glomeruli. Still, as these  
287 LNs have only weak active membrane properties, postsynaptic potentials just spread  
288 within the same glomerulus. Therefore, these neurons could serve similar purposes,  
289 and few omniglomerular type II LNs could perform similar functions as many PG  
290 uniglomerular cells.

291 In addition, it is important to consider that nonspiking type II LNs are not a  
292 homogenous neuron population (Fusca et al., 2013; Husch et al., 2009b). In a  
293 subpopulation of type II LNs, we observed correlated  $Ca^{2+}$  dynamics in subsets of  
294 glomeruli. These neurons typically responded to odorant stimulations with strong  
295 depolarizations, including spikelets, which apparently can propagate, at least to some  
296 extent, to a set of glomeruli. Since this subpopulation of nonspiking type II LNs (type  
297 IIa1 LNs) was previously shown to be cholinergic (Fusca et al., 2013; Neupert et al.,  
298 2018), they are likely excitatory. The intrinsic electrophysiological properties of the  
299 cholinergic type IIa LNs suggest that they might be part of an excitatory network, which  
300 activates neurons in specific sets of glomeruli. This hypothesis is in line with previous  
301 studies in the fruit fly, where excitatory LNs, while being multiglomerular, only activate  
302 specific glomeruli, thereby providing distinct arrays of glomeruli with excitatory input  
303 and distributing odor-evoked activity over an ensemble of PNs (Das et al., 2017; Huang  
304 et al., 2010; Olsen et al., 2007; Root et al., 2007; Shang et al., 2007; reviewed in  
305 Wilson, 2013).

306 While type IIa1 are cholinergic and type II LNs generally express multiple  
307 neuropeptides (Fusca et al., 2015; Neupert et al., 2012, 2018), the primary transmitter  
308 of most type II LNs is yet to be revealed. One candidate is glutamate, which is an  
309 inhibitory transmitter in the *Drosophila* AL (Liu and Wilson, 2013) and in cockroach  
310 metathoracic motor neurons (Sattelle, 1992).

311 We conclude that in the cockroach AL, sensory inputs are processed and  
312 computed in inter- and intraglomerular circuits which are formed by spiking type I and  
313 nonspiking type II LN.

314 **METHODS**

315 *Animals and materials*

316 *P. americana* were reared in crowded colonies at 27 °C under a 13 : 11 h light/ dark  
317 photoperiod regimen, on a diet of dry rodent food, oatmeal, and water. The  
318 experiments were performed with adult males. Unless stated otherwise, all chemicals  
319 were obtained from Applichem (Darmstadt, Germany) or Sigma-Aldrich (Taufkirchen,  
320 Germany) and had the purity level 'pro analysis'.

321

322 *Intact brain preparation*

323 The brain preparation leaving the entire olfactory network intact has been described  
324 previously (Demmer and Kloppenburg, 2009; Husch et al., 2009a; Kloppenburg et al.,  
325 1999). Animals were anesthetized by CO<sub>2</sub>, placed in a custom-built holder, and the  
326 head was immobilized with tape (tesa ExtraPower Gewebepband, Tesa, Hamburg,  
327 Germany). The head capsule was opened by cutting a window between the two  
328 compound eyes and the antennae's bases. The brain with its antennal nerves and  
329 attached antennae was dissected in extracellular saline (see below) and pinned in a  
330 Sylgard-coated (Dow Corning Corp., Midland, Michigan, USA) recording chamber. To  
331 get access to the recording site, we desheathed parts of the AL using fine forceps, and  
332 preparations were enzymatically treated with a combination of papain (0.3 mg·ml<sup>-1</sup>,  
333 P4762, Sigma) and L-cysteine (1 mg·ml<sup>-1</sup>, 30090, Fluka) dissolved in extracellular  
334 saline (~3 min, room temperature (RT), ~24°C). For electrophysiological recordings,  
335 the somata of the AL neurons were visualized with a fixed stage upright microscope  
336 (AxioExaminer, Carl Zeiss, Jena, Germany) using a 20x water-immersion objective

337 (20x W Apochromat, NA=1) with a 4x magnification changer, and infrared differential  
338 interference contrast optics (Dodt and Zieglgansberger, 1994).

339

#### 340 *Identification of antennal lobe neurons*

341 The prerequisite to study the physiology of identified neurons is the unequivocal  
342 identification of neuron types. The identification was performed as described by Fusca  
343 et al., 2013. Briefly, AL neurons were first pre-identified by the size and location of their  
344 somata. Recordings were performed under visual control from cell bodies in the  
345 ventrolateral somata group (VSG, Distler, 1989), where different neuron types are  
346 located in separated clusters. This pre-identification has a high success rate for the  
347 major neuron types (>90%), and was verified in each case by the physiological and  
348 morphological characterization during and after the recording using the following  
349 criteria: Two main LN types were identified by their distinctive physiological properties:  
350 1) spiking type I LNs that generated Na<sup>+</sup> driven action potentials upon odor stimulation  
351 and, 2) nonspiking type II LNs, in which odor stimulation evoked depolarizations, but  
352 no Na<sup>+</sup> driven action potentials (Husch et al., 2009a, 2009b). Type I LNs had  
353 arborizations in many, but not all glomeruli. The density of processes varied between  
354 glomeruli of a given type I LNs. Type II LN had processes in all glomeruli. The density  
355 and distribution of arborizations were similar in all glomeruli of a given type II LN, but  
356 varied between different type II LN. Two sub-types (type IIa and type IIb) can be  
357 distinguished by the branch patterns within the glomeruli, the size and branch pattern  
358 of low order neurites, odor responses, and active membrane properties (Husch et al.,  
359 2009b). Type IIa LNs had strong Ca<sup>2+</sup> dependent active membrane properties and  
360 responded with odor specific elaborate patterns of excitation and periods of inhibition.



361 In a subset of the type IIa neurons, which are cholinergic (type IIa1, Fusca et al., 2013)  
362 the excitation included  $\text{Ca}^{2+}$  driven 'spikelets' riding on the depolarization. In contrast,  
363 type IIb LNs responded mostly with sustained, relatively smooth depolarizations.

364

### 365 *Whole cell recordings*

366 Whole-cell recordings were performed at RT following the methods described by  
367 Hamill et al., 1981. Electrodes with tip resistances between 2-3 M $\Omega$  were fashioned  
368 from borosilicate glass (inner diameter 0.86 mm, outer diameter 1.5 mm, GB150-8P,  
369 Science Products, Hofheim, Germany) with a vertical pipette puller (PP-830 or PC-10,  
370 Narishige, Japan). Recording pipettes were filled with intracellular solution containing  
371 (in mM): 218 K-aspartate, 10 NaCl, 2 MgCl<sub>2</sub>, 10 HEPES, and 0.8 Oregon Green 488  
372 BAPTA-1 hexapotassium salt (OGB1, O6806, ThermoFisher Scientific, Waltham, MA,  
373 USA) adjusted to pH 7.2 with KOH. In some experiments, 2 mM lidocaine N-ethyl  
374 chloride (QX-314, #Q-150, Alomone, Jerusalem, Israel) was added to the intracellular  
375 solution. During the experiments, if not stated otherwise, the cells were superfused  
376 constantly with extracellular solution containing (in mM): 185 NaCl, 4 KCl, 6 CaCl<sub>2</sub>, 2  
377 MgCl<sub>2</sub>, 10 HEPES, 35 D-glucose. The solution was adjusted to pH 7.2 with NaOH.

378 Whole-cell current clamp recordings were made with an EPC10 patch clamp  
379 amplifier (HEKA-Elektronik, Lambrecht, Germany) controlled by the program  
380 Patchmaster (version 2.53, HEKA-Elektronik) running under Windows. The  
381 electrophysiological data were sampled at 10 kHz. The recordings were low pass  
382 filtered at 2 kHz with a 4-pole Bessel-Filter. Compensation of the offset potential and  
383 capacitive currents was performed using the 'automatic mode' of the EPC10 amplifier.  
384 Whole-cell capacitance was determined by using the capacitance compensation (C-

385 slow) of the amplifier. The liquid junction potential between intracellular and  
386 extracellular solution was also compensated (16.9 mV, calculated with Patcher's-  
387 Power-Tools plug-in  
388 [<https://www3.mpibpc.mpg.de/groups/neher/index.php?page=aboutppt>] for Igor Pro 6  
389 [Wavemetrics, Portland, Oregon]). Voltage errors due to series resistance ( $R_s$ ) were  
390 minimized using the RS-compensation of the EPC10.  $R_s$  was compensated between  
391 60% and 70% with a time constant ( $\tau$ ) of 10  $\mu$ s.

392

### 393 *Odor stimulation*

394 To deliver the odorants, we used a continuous airflow system. Carbon-filtered,  
395 humidified air was guided across the antenna at a flow rate of  $\sim 2$  l·min<sup>-1</sup> ('main  
396 airstream') through a glass tube (inner diameter 10 mm) that was placed perpendicular  
397 to and within 20-30 mm distance of the antennae. To apply odorants, 5 ml of odorant-  
398 containing solutions (either pure or diluted in mineral oil [M8410, Sigma]) were  
399 transferred into 100 ml glass vessels. Strips of filter paper in the odorant solution were  
400 used to facilitate evaporation. The concentration of each odorant was adjusted to  
401 match the vapor pressure of the odorant with the lowest value (eugenol). Dilutions  
402 were as follows:  $\alpha$ -ionone 40.9% (I12409, Aldrich), +/- citral 24.2% (C83007, Aldrich),  
403 1-hexanol 2.4% (52830, Fluka), benzaldehyde (418099, Aldrich) 2.2%, citronellal 8.7%  
404 (C2513, Aldrich), eugenol 100% (E51791, Aldrich), geraniol 73.7% (48799, Fluka),  
405 Isoamylacetate (112674, Aldrich) 13.7%, pyrrolidine 0.035% (83241, Fluka). The  
406 headspace of pure mineral oil was the control stimulus (blank). During a 500 ms  
407 stimulus,  $\sim 17$  ml of the vessel volume was injected into the main air stream. The  
408 solenoids were controlled by the D/A-interface of the EPC10 patch clamp amplifier and

409 the Patchmaster software. Odorant-containing air was quickly removed from the  
410 experimental setup with a vacuum funnel (inner diameter 3.5 cm) placed 5 cm behind  
411 the antennae. To allow for sensory recovery, consecutive odorant stimulations of the  
412 same preparation were performed after intervals of at least 60 s with non-odorant  
413 containing air.

414

#### 415 *Calcium Imaging*

416 Odor evoked calcium dynamics were measured with the Ca<sup>2+</sup> indicator OGB1 (see the  
417 intracellular solution), a single wavelength, high-affinity dye suitable to monitor fast  
418 intracellular Ca<sup>2+</sup> signals. The imaging setup consisted of a Zeiss AxioCam/MRm CCD  
419 camera with a 1388x1040 chip and a Polychromator V (Till Photonics, Gräfelfing,  
420 Germany) that was coupled *via* an optical fiber into the Zeiss AxioExaminer upright  
421 microscope. The camera and polychromator were controlled by the software Zen pro,  
422 including the module 'Physiology' (2012 blue edition, Zeiss). After establishing the  
423 whole-cell configuration, neurons were held in current clamp mode, and a  
424 hyperpolarizing current (~-200 pA) was injected for about 45-60 min to allow for dye  
425 loading. After loading, up to nine different odorants were applied as 500 ms pulses  
426 onto the ipsilateral antenna. Odor-induced Ca<sup>2+</sup> transients in the OGB1-loaded  
427 neurons were monitored by images acquired at 488 nm excitation with 50 ms exposure  
428 time and a frame rate of ~18 Hz. The emitted fluorescence was detected through a  
429 500-550 nm bandpass filter (BP525/50), and data were acquired using 5x5 on-chip  
430 binning. Images were recorded in arbitrary units (AU) and analyzed as 16-bit grayscale  
431 images.

432

433 *Analysis of odor-evoked calcium signals*

434 The analysis was performed offline using ImageJ (version 2.0.0-rc-64/1.51s) and  
435 Prism 7 (GraphPad, California, USA). Amplitudes and kinetics of the Ca<sup>2+</sup> signals were  
436 calculated as means (in AU) of individual glomeruli, which were defined as the  
437 respective regions of interest (ROI). ROI were defined on transmitted light images of  
438 the investigated antennal lobes. The Ca<sup>2+</sup> signals are given as relative fluorescence  
439 changes ( $\Delta F/F_0$ ). To correct for bleaching, biexponential fits to the time courses of the  
440 glomerular Ca<sup>2+</sup> signals during the blank stimulus, which lacked the odorant evoked  
441 Ca<sup>2+</sup> influx, were used.

442 For statistical analysis of data obtained for the different cell types, nonparametric  
443 Kruskal-Wallis tests with Dunn's multiple comparisons tests were performed in Prism  
444 7. Correlation coefficients from matrices of glomerular tuning curves are given as  
445 nonparametric Spearman correlation  $r$ . A significance level of 0.05 was accepted for  
446 all tests. All calculated values are expressed as mean  $\pm$  standard deviation.

447

448 *Single-cell and double-labeling and confocal microscopy*

449 To label individual cells, 1% (w/v) biocytin (B4261, Sigma) was added to the pipette  
450 solution. After the electrophysiological recordings, the brains were fixed in Roti-Histofix  
451 (P0873, Carl Roth, Karlsruhe, Germany) overnight at 4°C. Subsequently, the brains  
452 were rinsed in 0.1 M phosphate buffered saline (PBS, 3 x 20 min and then for ~12 h,  
453 RT). PBS contained (in mM) 72 Na<sub>2</sub>HPO<sub>4</sub>·2H<sub>2</sub>O, 28 NaH<sub>2</sub>PO<sub>4</sub>·H<sub>2</sub>O, resulting in pH  
454 7.2. To facilitate streptavidin penetration, the samples were treated with a commercially  
455 available collagenase/dispase mixture (1 mg·ml<sup>-1</sup>, 269638, Roche Diagnostics,  
456 Mannheim, Germany) and hyaluronidase (1 mg·ml<sup>-1</sup>, H3506, Sigma-Aldrich) in PBS

457 (1 h, 37°C), rinsed in PBS (3 x 10 min, 4°C) and then pre-incubated in blocking  
458 solution, consisting of PBS containing 1% (w/v) Triton X-100 (A1388, AppliChem) and  
459 10% (v/v) normal goat serum (S-1000, Vector Labs, Burlingame, CA) for 1 h at RT. The  
460 brains were then incubated with *Alexa 633* conjugated streptavidin (1:400, S21375,  
461 Invitrogen, Eugene, OR) in PBS supplemented with 10% (v/v) normal goat serum for  
462 ~12 h at 4°C, rinsed in PBS (3 x 10 min, RT), dehydrated, cleared, and mounted in  
463 methylsalicylate.

464 In some preparations, we used immunohistochemistry to label synapsin to mark  
465 the glomeruli. After pre-incubation in blocking solution and before the streptavidin  
466 incubation, these brains were incubated for 5 days at 4°C with a monoclonal primary  
467 mouse antibody against the presynaptic vesicle protein synapsin I (3C11, supernatant;  
468 obtained from the Developmental Studies Hybridoma Bank, University of Iowa, RRID:  
469 AB\_528479), diluted 1:50 in blocking solution. Subsequently, the brains were rinsed in  
470 PBS-1% Triton X-100 (2x2h, RT), incubated in *Alexa 488* conjugated goat anti-mouse  
471 secondary antibody for 5 days at 4°C (1:200 in blocking solution, 115-545-062,  
472 Dianova, Hamburg, Germany) and rinsed in PBS-1% Triton X-100 (2x2h, RT) and PBS  
473 (3x10min, RT). 3C11 (anti-SYNORF1) was deposited to the DSHB by Buchner, E.  
474 (DSHB Hybridoma Product 3C11 (anti SYNORF1, Klagges et al., 1996)).

475 Fluorescence images were captured with confocal microscopes equipped with  
476 Plan-Apochromat 10x (numerical aperture 0.45) and Plan-Apochromat 20x (numerical  
477 aperture 0.75) objectives (LSM 510, Zeiss) or with a 20x objective (SP8, Leica  
478 Microsystems, Wetzlar, Germany) respectively. *Alexa 633* was excited at 633 nm, and  
479 emission was collected through a 650 nm long-pass filter. *Alexa 488* was excited at  
480 488 nm, and emission was collected through a 505-530 nm bandpass filter. Confocal

481 images were adjusted for contrast and brightness and overlaid in ImageJ. The final  
482 figures were prepared in Affinity Designer (Serif, Nottingham, UK).

483 **ROLE OF AUTHORS**

484 Study concept and design: DF and PK. Acquisition of data: DF. Analysis and  
485 interpretation of data: DF and PK. Drafting the article: DF and PK.

486

487 **ACKNOWLEDGEMENTS**

488 We thank Helmut Wratil for his excellent technical assistance. The work in PK's  
489 laboratory was supported by grants from the Deutsche Forschungsgemeinschaft.

490

491 **CONFLICT OF INTEREST**

492 The authors declare that they have no conflict of interest.

493

494 **REFERENCES**

- 495 Assisi, C., and Bazhenov, M. (2012). Synaptic inhibition controls transient oscillatory  
496 synchronization in a model of the insect olfactory system. *Front. Neuroengineering* 5, 7.
- 497 Assisi, C., Stopfer, M., and Bazhenov, M. (2012). Excitatory local interneurons enhance tuning  
498 of sensory information. *PLoS Comput Biol* 8, e1002563.
- 499 Aungst, J.L., Heyward, P.M., Puche, A.C., Karnup, S.V., Hayar, A., Szabo, G., and Shipley,  
500 M.T. (2003). Centre-surround inhibition among olfactory bulb glomeruli. *Nature* 426, 623–629.
- 501 Berck, M.E., Khandelwal, A., Claus, L., Hernandez-Nunez, L., Si, G., Tabone, C.J., Li, F.,  
502 Truman, J.W., Fetter, R.D., Louis, M., et al. (2016). The wiring diagram of a glomerular  
503 olfactory system. *ELife* 5.
- 504 Berg, B.G., Schachtner, J., Utz, S., and Homberg, U. (2007). Distribution of neuropeptides in  
505 the primary olfactory center of the heliothine moth *Heliothis virescens*. *Cell Tissue Res* 327,  
506 385–398.
- 507 Bradler C, K.P., Warren B, Bardos V, Schleicher S, Klein A. (2016). Properties and  
508 physiological function of Ca<sup>2+</sup>-dependent K<sup>+</sup> currents in uniglomerular olfactory projection  
509 neurons. *J. Neurophysiol.* 115, 2330–2340.
- 510 Bufler, J., Zufall, F., Franke, C., and Hatt, H. (1992a). Patch-clamp recordings of spiking and  
511 nonspiking interneurons from rabbit olfactory bulb slices: membrane properties and ionic  
512 currents. *J. Comp. Physiol. [A]* 170, 145–152.
- 513 Bufler, J., Zufall, F., Franke, C., and Hatt, H. (1992b). Patch-clamp recordings of spiking and  
514 nonspiking interneurons from rabbit olfactory bulb slices: GABA- and other transmitter  
515 receptors. *J. Comp. Physiol. [A]* 170, 153–159.
- 516 Burrows, M. (1989). Processing of mechanosensory signals in local reflex pathways of the  
517 locust. *J. Exp. Biol.* 146, 209–227.
- 518 Chou, Y.-H., Spletter, M.L., Yaksi, E., Leong, J.C.S., Wilson, R.I., and Luo, L. (2010).  
519 Diversity and wiring variability of olfactory local interneurons in the *Drosophila* antennal lobe.  
520 *Nat Neurosci.*
- 521 Christensen, T.A., Waldrop, B.R., Harrow, I.D., and Hildebrand, J.G. (1993). Local  
522 interneurons and information processing in the olfactory glomeruli of the moth *Manduca sexta*.  
523 *J Comp Physiol A* 173, 385–399.
- 524 Christensen, T.A., Waldrop, B.R., and Hildebrand, J.G. (1998). GABAergic mechanisms that  
525 shape the temporal response to odors in moth olfactory projection neurons. *Ann N Acad Sci*  
526 855, 475–481.
- 527 Das, A., Chiang, A., Davla, S., Priya, R., Reichert, H., Vijayraghavan, K., and Rodrigues, V.  
528 (2011). Identification and analysis of a glutamatergic local interneuron lineage in the adult  
529 *Drosophila* olfactory system. *Neural Syst Circuits* 1, 4.



- 530 Das, S., Trona, F., Khallaf, M.A., Schuh, E., Knaden, M., Hansson, B.S., and Sachse, S. (2017).  
531 Electrical synapses mediate synergism between pheromone and food odors in *Drosophila*  
532 *melanogaster*. *Proc. Natl. Acad. Sci. U. S. A.* *114*, E9962–E9971.
- 533 Demmer, H., and Kloppenburg, P. (2009). Intrinsic Membrane Properties and Inhibitory  
534 Synaptic Input of Kenyon Cells as Mechanisms for Sparse Coding? *J. Neurophysiol.* *102*,  
535 1538–1550.
- 536 Diamond, J.S. (2017). Inhibitory Interneurons in the Retina: Types, Circuitry, and Function.  
537 *Annu. Rev. Vis. Sci.* *3*, 1–24.
- 538 Distler, P. (1989). Histochemical demonstration of GABA-like immunoreactivity in cobalt  
539 labeled neuron individuals in the insect olfactory pathway. *Histochemistry* *91*, 245–249.
- 540 Distler, P. (1990). Synaptic connections of dopamine-immunoreactive neurons in the antennal  
541 lobes of *Periplaneta americana*. Colocalization with GABA-like immunoreactivity.  
542 *Histochemistry* *93*, 401–408.
- 543 Distler, P.G., and Boeckh, J. (1997a). Synaptic connections between identified neuron types in  
544 the antennal lobe glomeruli of the cockroach, *Periplaneta americana*: I. Uniglomerular  
545 projection neurons. *J Comp Neurol* *378*, 307–319.
- 546 Distler, P.G., and Boeckh, J. (1997b). Synaptik connections between identified neuron types in  
547 the antennal lobe glomeruli of the cockroach *Periplaneta americana*: II multiglomerular  
548 interneurons. *J Comp Neurol* *383*, 529–540.
- 549 Distler, P.G., and Boeckh, J. (1997c). Synaptik connections between identified neuron types in  
550 the antennal lobe glomeruli of the cockroach *Periplaneta americana*: II multiglomerular  
551 interneurons. *J Comp Neurol* *383*, 529–540.
- 552 Distler, P.G., Gruber, C., and Boeckh, J. (1998). Synaptic connections between GABA-  
553 immunoreactive neurons and uniglomerular projection neurons within the antennal lobe of the  
554 cockroach, *Periplaneta americana*. *Synapse* *29*, 1–13.
- 555 Dodt, H.U., and Zieglansberger, W. (1994). Infrared videomicroscopy: a new look at neuronal  
556 structure and function. *Trends Neurosci.* *17*, 453–458.
- 557 Ennis, M., Puche, A.C., Holy, T., and Shipley, M.T. (2015). Chapter 27 - The Olfactory System.  
558 In *The Rat Nervous System (Fourth Edition)*, G. Paxinos, ed. (San Diego: Academic Press), pp.  
559 761–803.
- 560 Ernst, K.D., and Boeckh, J. (1983). A neuroanatomical study on the organization of the central  
561 antennal pathways in insects. III. Neuroanatomical characterization of physiologically defined  
562 response types of deutocerebral neurons in *Periplaneta americana*. *Cell Tissue Res* *229*, 1–22.
- 563 Fujimura, K., Yokohari, F., and Tateda, H. (1991). Classification of antennal olfactory  
564 receptors of the cockroach, *Periplaneta americana*. *Zool Sci* *8*, 243–255.

- 565 Fujiwara, T., Kazawa, T., Haupt, S.S., and Kanzaki, R. (2014). Postsynaptic odorant  
566 concentration dependent inhibition controls temporal properties of spike responses of  
567 projection neurons in the moth antennal lobe. *PLoS One* 9, e89132.
- 568 Fusca, D., Husch, A., Baumann, A., and Kloppenburg, P. (2013). Choline acetyltransferase-  
569 like immunoreactivity in a physiologically distinct subtype of olfactory nonspiking local  
570 interneurons in the cockroach (*Periplaneta americana*). *J. Comp. Neurol.* 521, 3556–3569.
- 571 Fusca, D., Schachtner, J., and Kloppenburg, P. (2015). Colocalization of allatotropin and  
572 tachykinin-related peptides with classical transmitters in physiologically distinct subtypes of  
573 olfactory local interneurons in the cockroach (*Periplaneta americana*). *J Comp Neurol* 523,  
574 1569–1586.
- 575 Galizia, C.G., and Kimmerle, B. (2004). Physiological and morphological characterization of  
576 honeybee olfactory neurons combining electrophysiology, calcium imaging and confocal  
577 microscopy. *J. Comp. Physiol. A Neuroethol. Sens. Neural. Behav. Physiol.* 190, 21–38.
- 578 Hamill, O.P., Marty, A., Neher, E., Sakmann, B., and Sigworth, F.J. (1981). Improved patch-  
579 clamp techniques for high-resolution current recording from cells and cell-free membrane  
580 patches. *Pflugers Arch* 391, 85–100.
- 581 Hoskins, S.G., Homberg, U., Kingan, T.G., Christensen, T.A., and Hildebrand, J.G. (1986).  
582 Immunocytochemistry of GABA in the antennal lobes of the sphinx moth *Manduca sexta*. *Cell*  
583 *Tissue Res* 244, 243–252.
- 584 Huang, J., Zhang, W., Qiao, W., Hu, A., and Wang, Z. (2010). Functional connectivity and  
585 selective odor responses of excitatory local interneurons in *Drosophila* antennal lobe. *Neuron*  
586 67, 1021–1033.
- 587 Husch, A., Paehler, M., Fusca, D., Paeger, L., and Kloppenburg, P. (2009a). Calcium current  
588 diversity in physiologically different local interneuron types of the antennal lobe. *J Neurosci*  
589 29, 716–726.
- 590 Husch, A., Paehler, M., Fusca, D., Paeger, L., and Kloppenburg, P. (2009b). Distinct  
591 electrophysiological properties in subtypes of nonspiking olfactory local interneurons correlate  
592 with their cell type-specific Ca<sup>2+</sup> current profiles. *J Neurophysiol* 102, 2834–2845.
- 593 Klagges, B.R., Heimbeck, G., Godenschwege, T.A., Hofbauer, A., Pflugfelder, G.O.,  
594 Reifegerste, R., Reisch, D., Schaupp, M., Buchner, S., and Buchner, E. (1996). Invertebrate  
595 synapsins: a single gene codes for several isoforms in *Drosophila*. *J. Neurosci.* 16, 3154–3165.
- 596 Kloppenburg, P., Ferns, D., and Mercer, A.R. (1999). Serotonin enhances central olfactory  
597 neuron responses to female sex pheromone in the male sphinx moth *manduca sexta*. *J Neurosci*  
598 19, 8172–8181.
- 599 Laurent, G., and Davidowitz, H. (1994). Encoding of olfactory information with oscillating  
600 neural assemblies. *Science* 265, 1872–1875.

- 601 Lemon, and Getz (1997). Temporal resolution of general odor pulses by olfactory sensory  
602 neurons in American cockroaches. *J. Exp. Biol.* *200*, 1809–1819.
- 603 Lemon, W.C., and Getz, W.M. (1998). Responses of cockroach antennal lobe projection  
604 neurons to pulsatile olfactory stimuli. *Ann. N. Y. Acad. Sci.* *855*, 517–520.
- 605 Lemon, W.C., and Getz, W.M. (2000). Rate code input produces temporal code output from  
606 cockroach antennal lobes. *Biosystems* *58*, 151–158.
- 607 Liu, W.W., and Wilson, R.I. (2013). Glutamate is an inhibitory neurotransmitter in the  
608 *Drosophila* olfactory system. *Proc Natl Acad Sci U A* *110*, 10294–10299.
- 609 Liu, S., Puche, A.C., and Shipley, M.T. (2016). The Interglomerular Circuit Potently Inhibits  
610 Olfactory Bulb Output Neurons by Both Direct and Indirect Pathways. *J. Neurosci. Off. J. Soc.*  
611 *Neurosci.* *36*, 9604–9617.
- 612 MacLeod, K., and Laurent, G. (1996). Distinct mechanisms for synchronization and temporal  
613 patterning of odor-encoding neural assemblies. *Science* *274*, 976–979.
- 614 Malun, D. (1991a). Inventory and distribution of synapses of identified uniglomerular  
615 projection neurons in the antennal lobe of *Periplaneta americana*. *J Comp Neurol* *305*, 348–  
616 360.
- 617 Malun, D. (1991b). Synaptic relationships between GABA-immunoreactive neurons and an  
618 identified uniglomerular projection neuron in the antennal lobe of *Periplaneta americana*: a  
619 double-labeling electron microscopic study. *Histochemistry* *96*, 197–207.
- 620 Malun, D., Waldow, U., Kraus, D., and Boeckh, J. (1993). Connections between the  
621 deutocerebrum and the protocerebrum, and neuroanatomy of several classes of deutocerebral  
622 projection neurons in the brain of male *Periplaneta americana*. *J Comp Neurol* *329*, 143–162.
- 623 Mohamed, A.A., Retzke, T., Chakraborty, S.D., Fabian, B., Hansson, B.S., Knaden, M., and  
624 Sachse, S. (2019). Odor mixtures of opposing valence unveil inter-glomerular crosstalk in the  
625 *Drosophila* antennal lobe. *Nat. Commun.* *10*, 1201.
- 626 Nagel, K.I., and Wilson, R.I. (2016). Mechanisms Underlying Population Response Dynamics  
627 in Inhibitory Interneurons of the *Drosophila* Antennal Lobe. *J. Neurosci.* *36*, 4325–4338.
- 628 Najac, M., Diez, A.S., Kumar, A., Benito, N., Charpak, S., and De Saint Jan, D. (2015).  
629 Intraglomerular lateral inhibition promotes spike timing variability in principal neurons of the  
630 olfactory bulb. *J. Neurosci.* *35*, 4319–4331.
- 631 Neupert, S., Fusca, D., Schachtner, J., Peter Kloppenburg, and Predel, R. (2012). Toward a  
632 single-cell-based analysis of neuropeptide expression in *Periplaneta americana* antennal lobe  
633 neurons. *J Comp Neurol* *520*, 694–716.
- 634 Neupert, S., Fusca, D., Kloppenburg, P., and Predel, R. (2018). Analysis of single neurons by  
635 perforated patch clamp recordings and MALDI-TOF mass spectrometry. *ACS Chem. Neurosci.*  
636 *9*, 2089–2096.

- 637 Nishino, H., Iwasaki, M., Kamimura, I., and Mizunami, M. (2012). Divergent and convergent  
638 projections to the two parallel olfactory centers from two neighboring, pheromone-receptive  
639 glomeruli in the male American cockroach. *J Comp Neurol* 520, 3428–3445.
- 640 Nishino, H., Watanabe, H., Kamimura, I., Yokohari, F., and Mizunami, M. (2015). Coarse  
641 topographic organization of pheromone-sensitive afferents from different antennal surfaces in  
642 the American cockroach. *Neurosci Lett* 595, 35–40.
- 643 Nishino, H., Iwasaki, M., Paoli, M., Kamimura, I., Yoritsune, A., and Mizunami, M. (2018).  
644 Spatial Receptive Fields for Odor Localization. *Curr. Biol. CB* 28, 600-608.e3.
- 645 Oliveira, E.E., Pippow, A., Salgado, V.L., Benschges, A., Schmidt, J., and Kloppenburg, P.  
646 (2010). Cholinergic currents in leg motoneurons of *Carausius morosus*. *J Neurophysiol* 103,  
647 2770–2782.
- 648 Olsen, S.R., and Wilson, R.I. (2008). Lateral presynaptic inhibition mediates gain control in an  
649 olfactory circuit. *Nature* 452, 956–960.
- 650 Olsen, S.R., Bhandawat, V., and Wilson, R.I. (2007). Excitatory interactions between olfactory  
651 processing channels in the *Drosophila* antennal lobe. *Neuron* 54, 89–103.
- 652 Paeger, L., Bardos, V., and Kloppenburg, P. (2017). Transient voltage-activated K(+) currents  
653 in central antennal lobe neurons: cell type-specific functional properties. *J. Neurophysiol.* 117,  
654 2053–2064.
- 655 Paoli, M., Nishino, H., Couzin-Fuchs, E., and Galizia, C.G. (2020). Coding of odour and space  
656 in the hemimetabolous insect *Periplaneta americana*. *J. Exp. Biol.* 223.
- 657 Pearson, K.G., and Fournier, C.R. (1975). Nonspiking interneurons in walking system of the  
658 cockroach. *J. Neurophysiol.* 38, 33–52.
- 659 Pippow, A., Husch, A., Pouzat, C., and Kloppenburg, P. (2009). Differences of Ca<sup>2+</sup> handling  
660 properties in identified central olfactory neurons of the antennal lobe. *CELL CALCIUM* 46,  
661 87–98.
- 662 Root, C.M., Semmelhack, J.L., Wong, A.M., Flores, J., and Wang, J.W. (2007). Propagation of  
663 olfactory information in *Drosophila*. *Proc. Natl. Acad. Sci. U. S. A.* 104, 11826–11831.
- 664 Sachse, S., and Galizia, C. (2002). Role of inhibition for temporal and spatial odor  
665 representation in olfactory output neurons: a calcium imaging study. *J Neurophysiol* 87, 1106–  
666 1117.
- 667 Sachse, S., Rappert, A., and Galizia, C.G. (1999). The spatial representation of chemical  
668 structures in the antennal lobe of honeybees: steps towards the olfactory code. *Eur. J. Neurosci.*  
669 11, 3970–3982.
- 670 Sattelle, D. (1992). Receptors for L-glutamate and GABA in the nervous system of an insect  
671 (*Periplaneta americana*). *Comp. Biochem. Physiol. Part C Comp. Pharmacol.* 103, 429–438.

- 672 Seki, Y., Rybak, J., Wicher, D., Sachse, S., and Hansson, B.S. (2010). Physiological and  
673 morphological characterization of local interneurons in the *Drosophila* antennal lobe. *J*  
674 *Neurophysiol* *104*, 1007–1019.
- 675 Shang, Y., Claridge-Chang, A., Sjulson, L., Pypaert, M., and Miesenbock, G. (2007).  
676 Excitatory Local Circuits and Their Implications for Olfactory Processing in the Fly Antennal  
677 Lobe. *Cell* *128*, 601–612.
- 678 Shepherd, G.M., Chen, W.R., and Greer, C.A. (2004). Olfactory Bulb. In *The Synaptic*  
679 *Organization of the Brain*, (Oxford University Press), p.
- 680 Silbering, A.F., Rytz, R., Grosjean, Y., Abuin, L., Ramdya, P., Jefferis, G.S.X.E., and Benton,  
681 R. (2011). Complementary function and integrated wiring of the evolutionarily distinct  
682 *Drosophila* olfactory subsystems. *J. Neurosci. Off. J. Soc. Neurosci.* *31*, 13357–13375.
- 683 Strausfeld, N.J., and Li, Y.S. (1999). Representation of the calyces in the medial and vertical  
684 lobes of cockroach mushroom bodies. *J Comp Neurol* *409*, 626–646.
- 685 Tabuchi, M., Dong, L., Inoue, S., Namiki, S., Sakurai, T., Nakatani, K., and Kanzaki, R. (2015).  
686 Two types of local interneurons are distinguished by morphology, intrinsic membrane  
687 properties, and functional connectivity in the moth antennal lobe. *J Neurophysiol*  
688 *jn.00050.2015*.
- 689 Wachowiak, M., and Shipley, M.T. (2006). Coding and synaptic processing of sensory  
690 information in the glomerular layer of the olfactory bulb. *Semin. Cell Dev. Biol.* *17*, 411–423.
- 691 Waldrop, B., Christensen, T.A., and Hildebrand, J.G. (1987). GABA-mediated synaptic  
692 inhibition of projection neurons in the antennal lobes of the sphinx moth, *Manduca sexta*. *J*  
693 *Comp Physiol A* *161*, 23–32.
- 694 Warren, B., and Kloppenburg, P. (2014). Rapid and Slow Chemical Synaptic Interactions of  
695 Cholinergic Projection Neurons and GABAergic Local Interneurons in the Insect Antennal  
696 Lobe. *J. Neurosci.* *34*, 13039–13046.
- 697 Watanabe, H., Nishino, H., Nishikawa, M., Mizunami, M., and Yokohari, F. (2010). Complete  
698 mapping of glomeruli based on sensory nerve branching pattern in the primary olfactory center  
699 of the cockroach *Periplaneta americana*. *J Comp Neurol* *518*, 3907–3930.
- 700 Watanabe, H., Haupt, S.S., Nishino, H., Nishikawa, M., and Yokohari, F. (2012). Sensillum-  
701 specific, topographic projection patterns of olfactory receptor neurons in the antennal lobe of  
702 the cockroach *Periplaneta americana*. *J Comp Neurol* *520*, 1687–1701.
- 703 Watanabe, H., Nishino, H., Mizunami, M., and Yokohari, F. (2017). Two Parallel Olfactory  
704 Pathways for Processing General Odors in a Cockroach. *Front. Neural Circuits* *11*, 32.
- 705 Wellis, D.P., and Scott, J.W. (1990). Intracellular responses of identified rat olfactory bulb  
706 interneurons to electrical and odor stimulation. *J. Neurophysiol.* *64*, 932–947.

707 Wilson, R.I. (2013). Early olfactory processing in *Drosophila*: mechanisms and principles.  
708 *Annu Rev Neurosci* 36, 217–241.

709 Wilson, R.I., and Laurent, G. (2005). Role of GABAergic inhibition in shaping odor-evoked  
710 spatiotemporal patterns in the *Drosophila* antennal lobe. *J Neurosci* 25, 9069–9079.

711 Yaksi, E., and Wilson, R.I. (2010). Electrical coupling between olfactory glomeruli. *Neuron*  
712 67, 1034–1047.

713

714 **FIGURES**

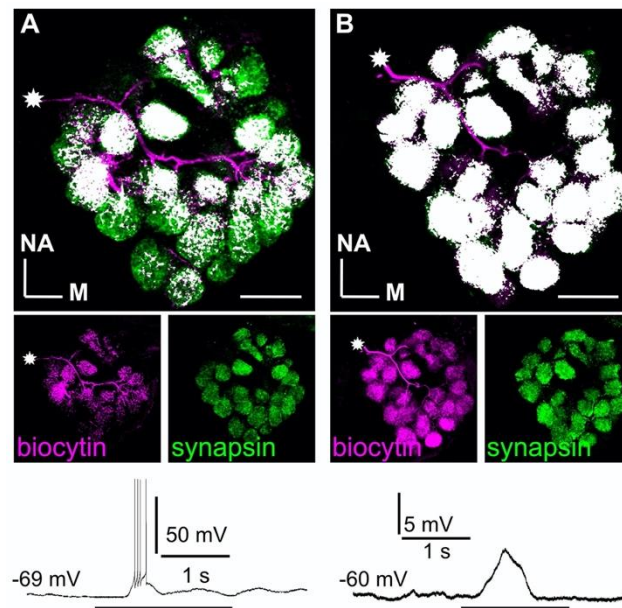

715

716 **Figure 1.** Branching patterns and odorant responses of spiking and nonspiking local  
717 interneurons. A spiking type I (A) and a nonspiking type II local interneuron (B) that  
718 were labeled with biocytin/streptavidin via the patch pipette. The glomeruli were  
719 visualized by synapsin-LIR. (A) Type I local interneuron. 13 μm stack of optical  
720 sections. The neuron innervates many but not all glomeruli and generates action  
721 potentials to an odorant stimulus (benzaldehyde). (B) Type II local interneuron. 15 μm  
722 stack of optical sections. The neuron innervated all glomeruli and responded to the  
723 odorant (benzaldehyde) with a graded depolarization. The stars mark the locations of  
724 the somata. Biocytin/streptavidin, magenta; synapsin-LIR, green; double-labeled  
725 pixels, white. NA: anterior, M: medial. Scale bars = 100 μm.

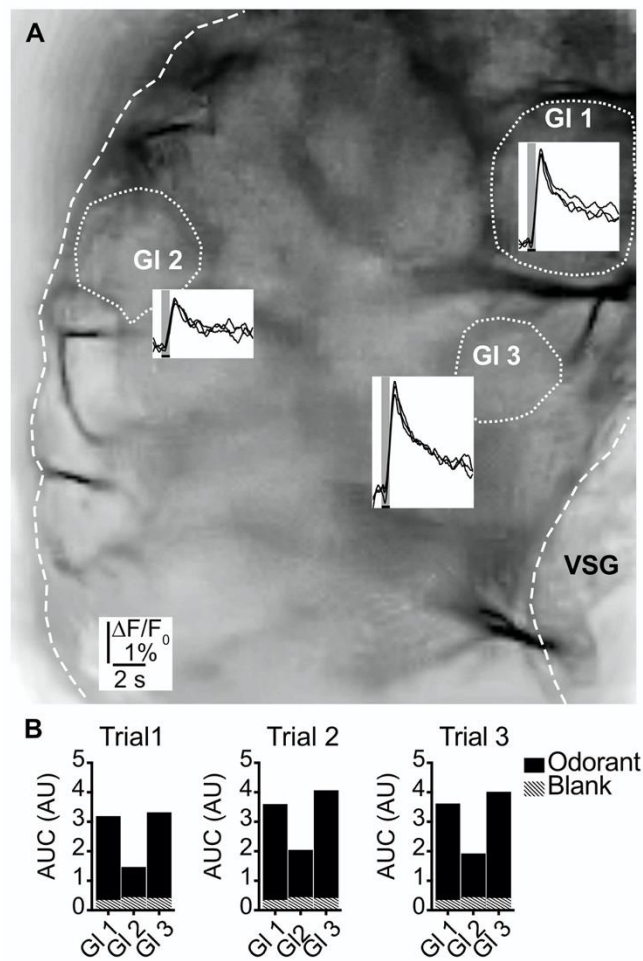

726

727

728 **Figure 2.** Odorant induced glomerular calcium signals are reproducible. (A)  
729 Transmitted light image of an investigated antennal lobe. The dotted lines mark the  
730 recorded glomeruli, and the insets show overlays of  $\text{Ca}^{2+}$  responses from three trials  
731 with the same odorant (hexanol). The grey bars mark the 500 ms odorant stimuli. (B)  
732 Areas under the curves of the  $\text{Ca}^{2+}$  signals that are shown in (A). The first three  
733 seconds after stimulus onset were analyzed. Hatched bars represent control signals  
734 to blank stimuli. AUC: area under the curve, GI: glomerulus, VSG: ventrolateral somata  
735 group.

736



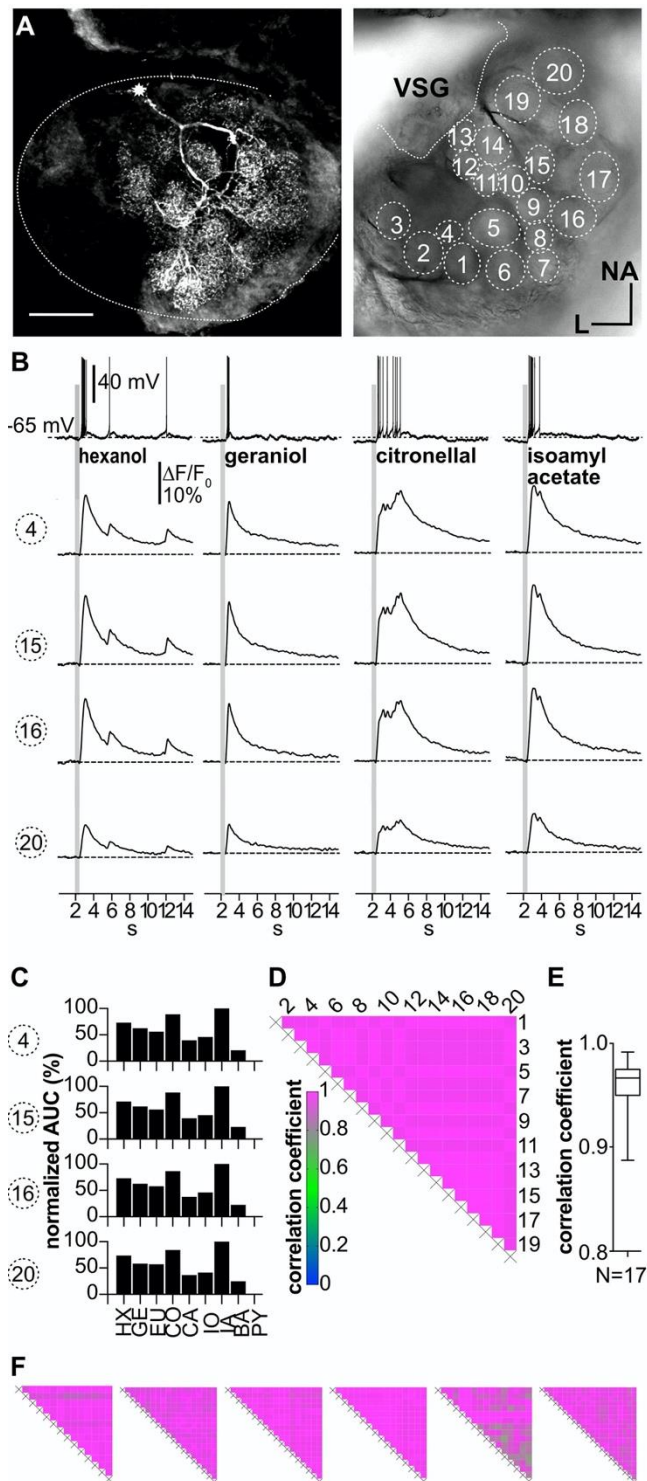

737

738 **Figure 3.**  $Ca^{2+}$  imaging in type I LNs shows uniform glomerular odor responses. (**A**)  
 739 Left: Biocytin/streptavidin labeled type I LN. The AL is outlined by the dotted line. The  
 740 star marks the position of the soma. Scale bar: 100  $\mu$ m. Right: Transmitted light image  
 741 of the same AL while the neuron was recorded. Orientation applies to both images.

742 The outlined glomeruli mark the regions of interest (individual glomeruli) that were  
743 individually analyzed. **(B)** Electrophysiological responses to four odorants (top traces)  
744 and the corresponding  $\text{Ca}^{2+}$  dynamics of four glomeruli that are marked in (A). Gray  
745 bars represent the 500 ms odorant stimuli. The neuron responded to different odorants  
746 with odorant specific spike trains. The time courses of the  $\text{Ca}^{2+}$  signals were similar in  
747 all glomeruli for a given odorant. **(C)** Tuning curves of glomerular responses. Areas  
748 under the curves of the odorant evoked glomerular  $\text{Ca}^{2+}$  signals (first 3 seconds after  
749 stimulus onset) were calculated for a set of nine odorants and normalized to the  
750 maximum response in the respective glomerulus. Every glomerulus responded most  
751 strongly to isoamyl acetate and least to benzaldehyde. **(D)** Heatmap showing the  
752 correlations between the glomerular tuning curves of every imaged glomerulus.  
753 Numbers correspond to the glomeruli in (A). All tuning curves were well correlated with  
754 coefficients of  $\sim 1$  (nonparametric Spearman correlation). **(E)** Mean correlation  
755 coefficient across all investigated type I LNs was  $0.96 \pm 0.03$  ( $N = 17$ ). **(F)** Heatmaps  
756 of correlations between glomerular tuning curves from six additional type I LNs. HX:  
757 hexanol, GE: geraniol, EU: eugenol, CO: citronellal, CA: citral, IO: ionone, IA:  
758 isoamylacetate, BA: benzaldehyde, PY: pyrrolidine.

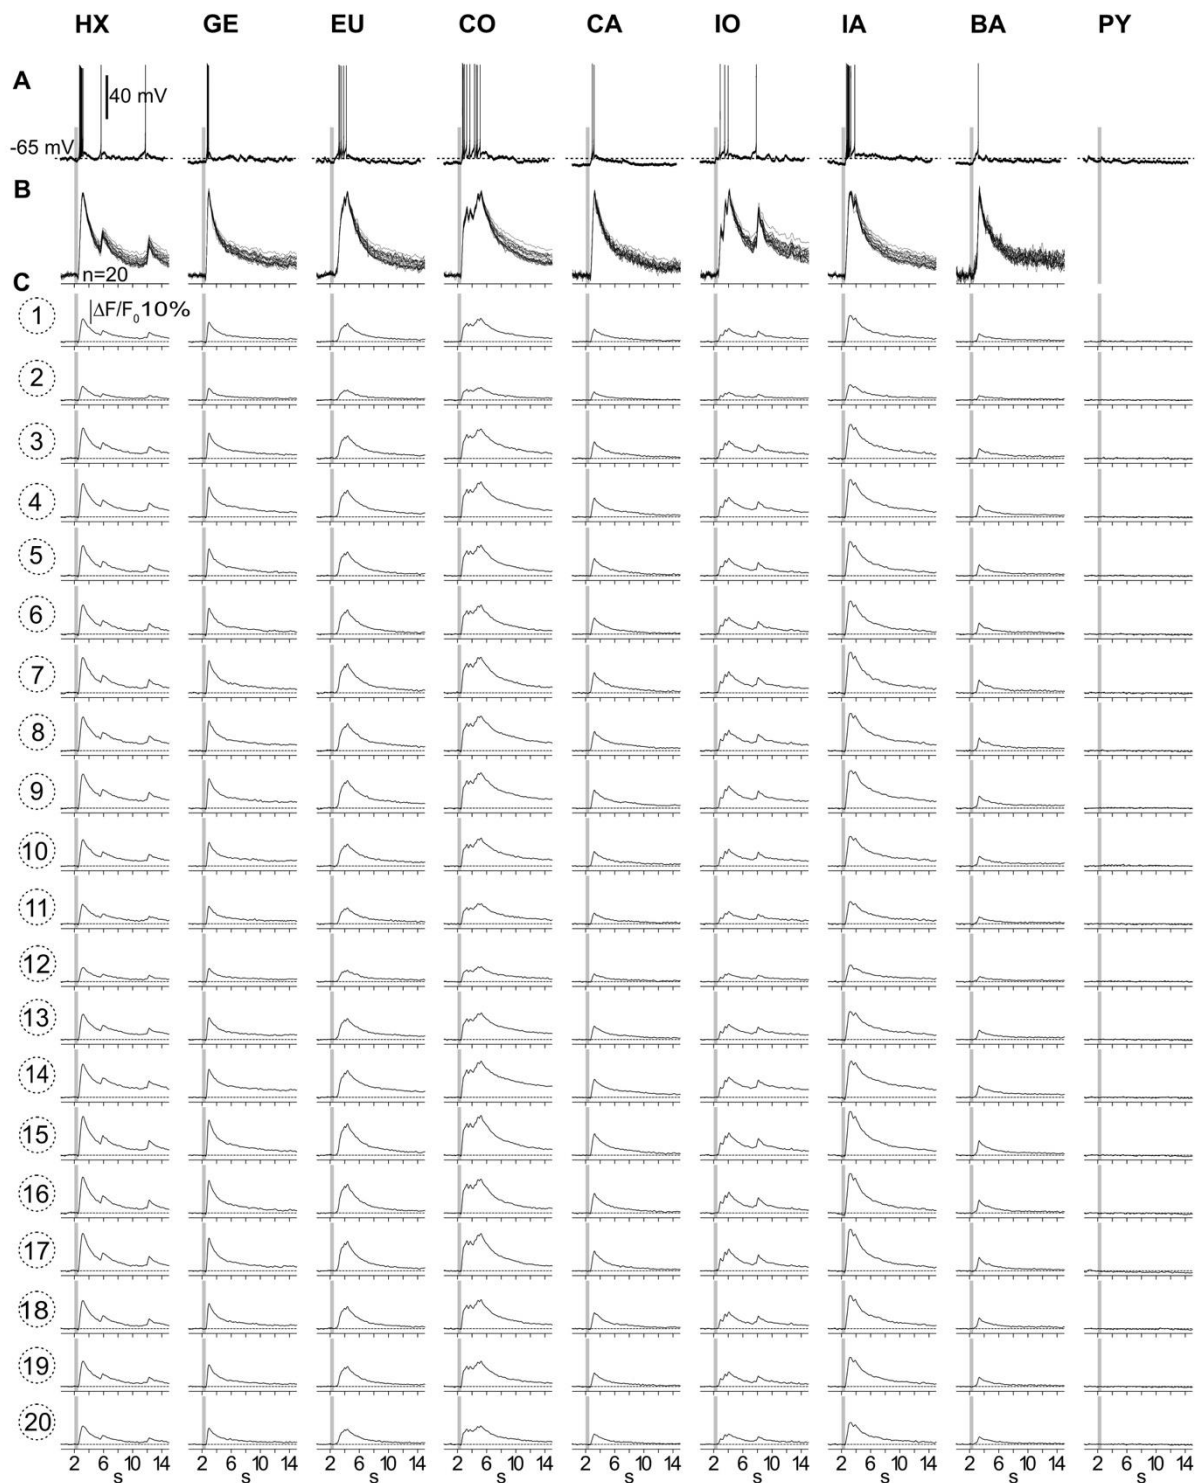

759

760 **Figure 3 - Figure supplement 1.**  $\text{Ca}^{2+}$  signals from all 20 imaged glomeruli.  
761 (A) Electrophysiological responses to all tested odorants. (B) Scaled overlays of the  
762 corresponding  $\text{Ca}^{2+}$  signals from all imaged glomeruli (n=20). The odorant induced

763 Ca<sup>2+</sup> signals were scaled to the same size. (C) Original odorant induced Ca<sup>2+</sup> signals  
764 from all glomeruli.  
765

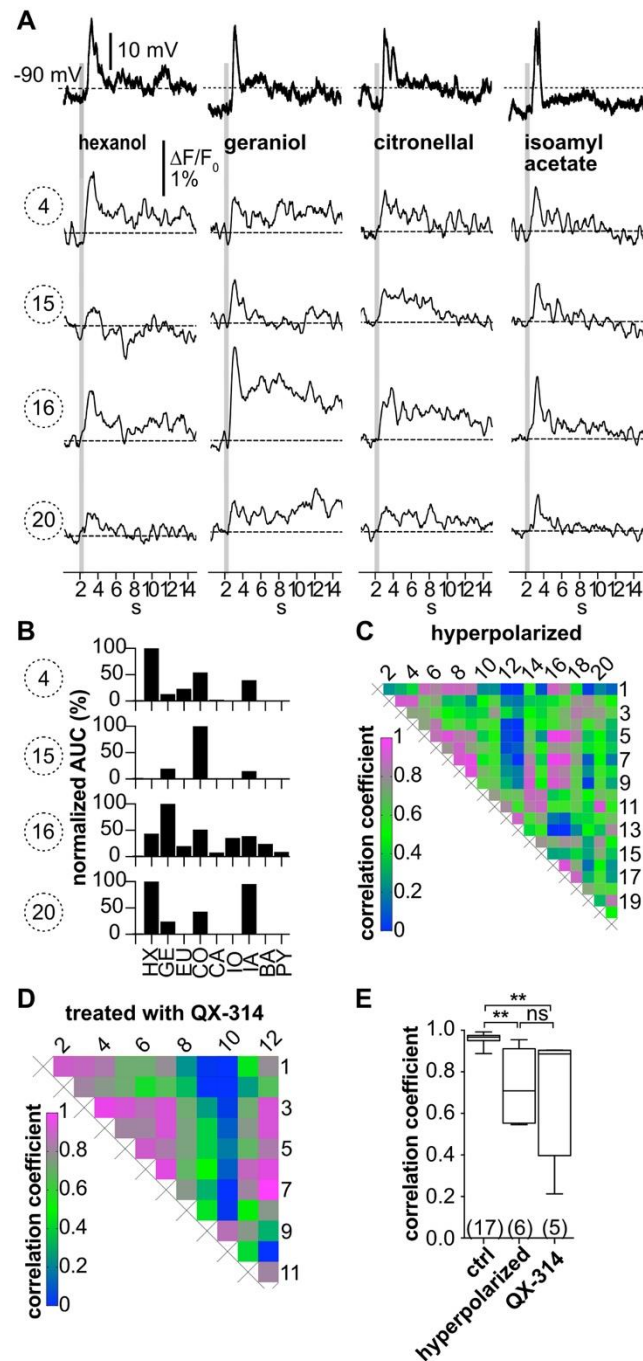

766

767 **Figure 4.** Hyperpolarization below the action potential threshold and pharmacological  
 768 block of action potential firing prevent the correlation between odorant induced  
 769 glomerular  $\text{Ca}^{2+}$  signals. Data in (A) - (C) are taken from the same type I LN as in  
 770 Figure 3. (A) Electrophysiological responses to odorants (top traces) and  
 771 corresponding  $\text{Ca}^{2+}$  dynamics in the same four glomeruli as shown in Figure 3. The  
 772 neuron was hyperpolarized to prevent the generation of action potentials upon

773 stimulation with odorants. Electrophysiologically, the neuron responded with odorant  
774 specific graded depolarizations. The high correlation of the glomerular  $\text{Ca}^{2+}$  signals  
775 shown in Figure 3 was inhibited. **(B)** The tuning curves of the glomerular responses  
776 (for details see Figure 3C) varied considerably, whereby the odorant that triggered the  
777 maximum  $\text{Ca}^{2+}$  signal in each individual glomerulus was different for each glomerulus.  
778 **(C)** Heatmap demonstrating the heterogeneous correlations between glomerular  
779 tuning curves. Numbers correspond to glomeruli in Figure 3A. Correlation coefficients  
780 ranged between 0 and 0.95 (median = 0.56). **(D)** Heatmap demonstrating the variable  
781 correlations between glomerular tuning curves of a neuron that was treated with the  
782 intracellular  $\text{Na}_v$  channel blocker QX-314. Correlation coefficients ranged between 0  
783 and 1 (median = 0.69). **(E)** Mean correlation coefficients of hyperpolarized ( $0.73 \pm 0.19$ ,  
784  $N = 6$ ,  $p = 0.0024$ ) and QX-314 treated ( $0.71 \pm 0.28$ ,  $N = 5$ ,  $p = 0.0067$ ) type I LNs were  
785 significantly decreased compared to the control group (Kruskal-Wallis and Dunn's  
786 multiple comparisons test). Hyperpolarized and QX-314 treated type I LNs were not  
787 significantly different ( $p > 0.9999$ ). Abbreviations as in Figure 3F.  
788

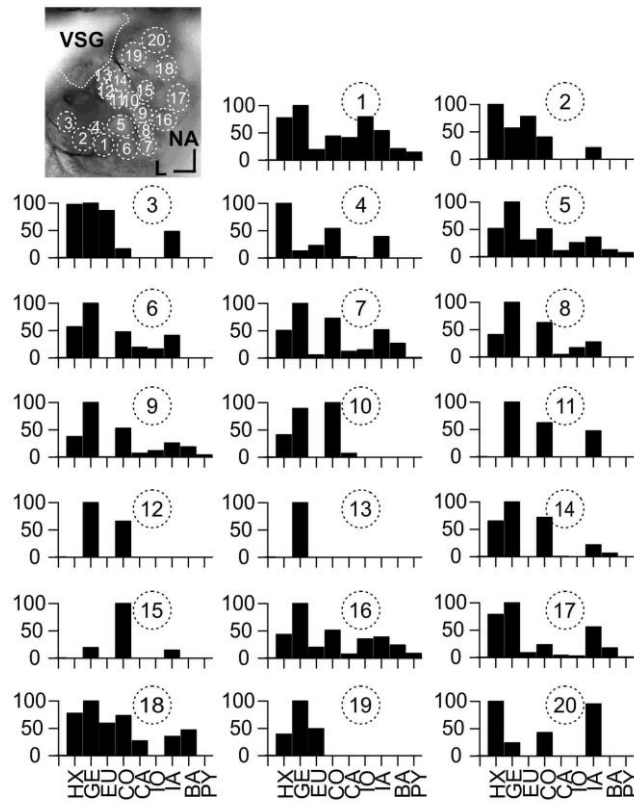

789

790 **Figure 4 - Figure supplement 1.** Tuning curves of all imaged glomeruli. Y-axes show

791 normalized odor response. For details, see Figure 3C. Abbreviations as in Figure 3F.

792

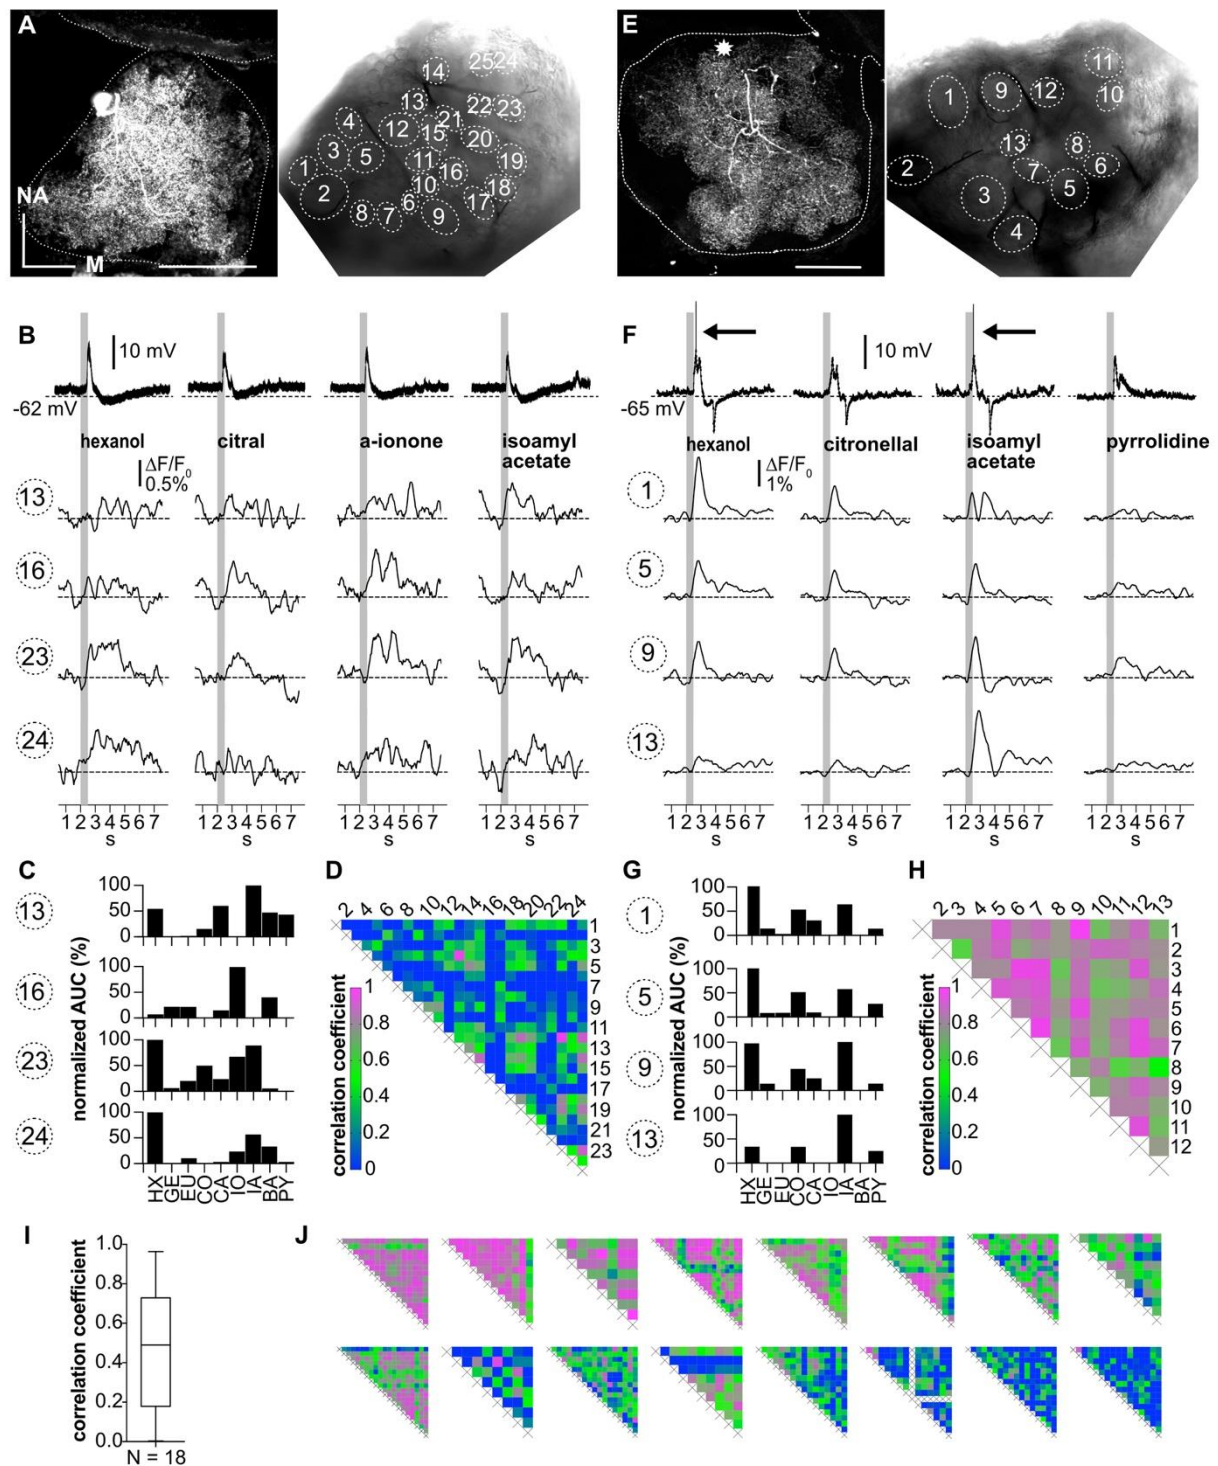

793

794 **Figure 5.**  $\text{Ca}^{2+}$  imaging of type II LNs shows heterogeneous glomerular odorant  
 795 responses. Data from a type IIb (**A-D**), and a type IIa LN (**E-H**). (**A, E**) Left:  
 796 Biocytin/streptavidin stainings of the investigated type II LNs. The ALs are outlined by  
 797 the dotted lines. The position of the soma in (**E**) is marked by the star. Scale bar: 100  
 798  $\mu\text{m}$ . Right: Transmitted light images of the same ALs during the experiment. Outlined



799 glomeruli were marked as regions of interest and individually analyzed. The  
800 orientations of the left and right images are similar. **(B, F)** Electrophysiological  
801 responses to four odorants (top traces) with the corresponding  $\text{Ca}^{2+}$  dynamics of four  
802 glomeruli that are marked in the images shown in A and E. Gray bars represent the  
803 500 ms odorant stimuli. **(B-D)** Type IIb LN. **(B)** The neuron responded similarly to the  
804 different odorants with graded depolarizations that were followed by slow  
805 hyperpolarizations. The time course and amplitude of the corresponding  $\text{Ca}^{2+}$  signals  
806 varied in different glomeruli for the different odorants. **(C)** Tuning curves of glomerular  
807  $\text{Ca}^{2+}$  signals (for details, see Figure 3C). The tuning curves of the different glomeruli  
808 varied considerably, while the maximum response was induced by different odorants  
809 in the different glomeruli. Some glomeruli were narrowly tuned (e.g., glomerulus 16);  
810 others were broadly tuned (e.g., glomerulus 23). **(D)** Heatmap showing the correlations  
811 between glomerular tuning curves of every imaged glomerulus. Numbers correspond  
812 to glomeruli shown in (A). Correlations between glomerular tuning curves were mostly  
813 low, with coefficients ranging between 0 and 0.96 (median = 0.15). **(F-H)** Type IIa LN.  
814 **(F)** The neuron responded similarly to different odorants with graded depolarizations  
815 that could include spikelets (e.g. hexanol, isoamylacetate, arrows mark the spikelets),  
816 whereas the time course and amplitude of the corresponding  $\text{Ca}^{2+}$  signals mostly  
817 varied between different glomeruli for different odorants. **(G)** Tuning curves of the  
818 glomerular  $\text{Ca}^{2+}$  signals shown in (F) (for details, see Figure 3C). Groups of glomeruli  
819 showed similar tuning curves (e.g., glomeruli 1, 5, and 9), while other glomeruli were  
820 individually tuned (e.g., glomerulus 13). **(H)** Heatmap showing correlations between  
821 glomerular tuning curves of every imaged glomerulus. Numbers correspond to the  
822 glomeruli marked in (E). Glomerular tuning curves correlated strongly in a subset of  
823 glomeruli, while the correlation was low between other glomeruli. Coefficients ranged  
824 between 0.45 and 0.96 (median = 0.76). **(I)** Mean correlation coefficients across all  
825 investigated type II LNs were  $0.53 \pm 0.23$  ( $N = 18$ ). **(J)** Heatmaps of correlations  
826 between glomerular tuning curves from all additional type II LNs in descending order  
827 of mean correlation coefficient. Abbreviations as in Figure 3F.

828

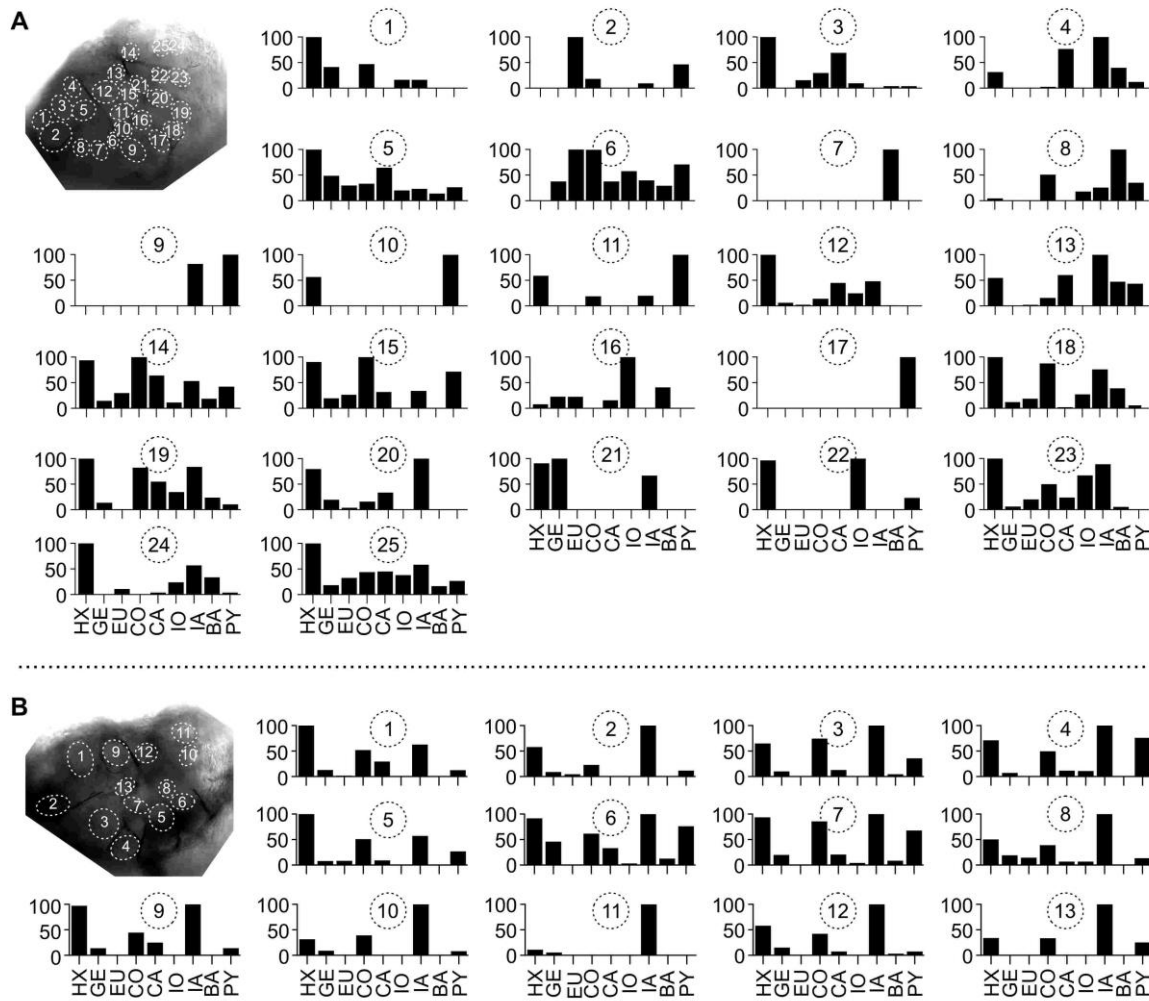

829

830 **Figure 5 - Figure supplement 1.** Glomerular tuning curves of all imaged glomeruli.

831 Tuning curves of all glomeruli from the neurons shown in Figure 5A-D (A) and Figure

832 5E-H (B). Y-axes show normalized odor response. For details, see Figure 3C.

833 Abbreviations as in Figure 3F.
